# Supplementary material for: Language Proficiency and Migrant–Native Disparities in Postpartum Depressive Symptoms
Source: MDPI journal article supplement (doi:10.3390/ijerph18094782), 2021-04-29
Supplement: s1 [file s1]

**Table S1.** Maternal characteristics by interview status among women who consented to participate (*n* = 5272)

| Characteristics                                                          | Not interviewed <sup>a</sup>       | Interviewed                        | <i>p</i> |
|--------------------------------------------------------------------------|------------------------------------|------------------------------------|----------|
|                                                                          | ( <i>n</i> = 2266)<br><i>n</i> (%) | ( <i>n</i> = 3006)<br><i>n</i> (%) |          |
| Sociodemographic characteristics                                         |                                    |                                    |          |
| Migrant ( <i>n</i> = 5272)                                               | 1199 (52.9)                        | 1573 (52.3)                        | 0.67     |
| Region of birth ( <i>n</i> = 5272)                                       |                                    |                                    |          |
| Portugal                                                                 | 1067 (47.1)                        | 1433 (47.7)                        |          |
| Brazil                                                                   | 176 (7.8)                          | 327 (10.9)                         |          |
| PALOP <sup>b</sup>                                                       | 697 (30.8)                         | 713 (23.7)                         |          |
| Other African countries                                                  | 46 (2.0)                           | 43 (1.4)                           | <0.001   |
| Europe                                                                   | 180 (7.9)                          | 347 (11.5)                         |          |
| Asia                                                                     | 67 (3.0)                           | 72 (2.4)                           |          |
| America                                                                  | 33 (1.4)                           | 71 (2.4)                           |          |
| Age (years) ( <i>n</i> = 5249)                                           |                                    |                                    |          |
| 18-24                                                                    | 444 (19.8)                         | 447 (14.9)                         |          |
| 25-34                                                                    | 1252 (55.8)                        | 1669 (55.5)                        | <0.001   |
| ≥35                                                                      | 547 (24.4)                         | 890 (29.6)                         |          |
| Marital status (no partner) ( <i>n</i> = 5238)                           | 680 (30.5)                         | 772 (25.7)                         | <0.001   |
| Highest education level attained ( <i>n</i> = 5059)                      |                                    |                                    |          |
| Post-secondary (>12 <sup>th</sup> grade)                                 | 537 (26.1)                         | 1102 (36.7)                        |          |
| Upper secondary (12 <sup>th</sup> grade)                                 | 721 (35.1)                         | 1088 (36.2)                        | <0.001   |
| Lower secondary (9 <sup>th</sup> grade)                                  | 521 (25.4)                         | 605 (20.1)                         |          |
| None or primary (≤4 <sup>th</sup> grade)                                 | 275 (13.4)                         | 210 (7.0)                          |          |
| Obstetric characteristics                                                |                                    |                                    |          |
| Multiparous ( <i>n</i> = 5006)                                           | 1217 (57.1)                        | 1468 (51.1)                        | <0.001   |
| Smoking during pregnancy ( <i>n</i> = 5139)                              | 320 (14.5)                         | 300 (10.2)                         | <0.001   |
| Complications during pregnancy <sup>c</sup> ( <i>n</i> = 5146)           | 611 (27.7)                         | 841 (28.6)                         | 0.44     |
| Twin pregnancy ( <i>n</i> = 5272)                                        | 51 (2.2)                           | 47 (1.6)                           | 0.07     |
| Delivery with any obstetric intervention <sup>d</sup> ( <i>n</i> = 5065) | 1407 (64.9)                        | 2020 (69.7)                        | <0.001   |
| Adverse neonatal outcomes <sup>e</sup> ( <i>n</i> = 5241)                | 365 (16.2)                         | 454 (15.2)                         | 0.29     |

<sup>a</sup> Not interviewed women included those who were unreachable or did not complete the interview. <sup>b</sup> PALOP refers to Portuguese-speaking African countries. <sup>c</sup> Complications during pregnancy were retrieved from clinical records and included: high blood pressure, preeclampsia, gestational diabetes, acute pyelonephritis, placenta praevia, placental abruption, and other rare complications. <sup>d</sup> Obstetric interventions included instrumented delivery (vacuum or forceps), episiotomy, and caesarean section. <sup>e</sup> Adverse neonatal outcomes included preterm birth, low birth weight, congenital malformation, or admission to a neonatal intensive care unit.

**Table S2.** Associations between language proficiency and EPDS scores  $\geq 11$ , and  $\geq 13$

| Proficiency in Portuguese                              |              | EDPS score  |           | EDPS score ≥11   |        |                          | EDPS score               |             | EDPS score ≥13 |                  |        |                          |                          |
|--------------------------------------------------------|--------------|-------------|-----------|------------------|--------|--------------------------|--------------------------|-------------|----------------|------------------|--------|--------------------------|--------------------------|
|                                                        |              | 0-10        |           | OR (95%CI)       | ptrend | aOR <sup>a</sup> (95%CI) | aOR <sup>b</sup> (95%CI) | 0-12        |                | OR (95%CI)       | ptrend | aOR <sup>a</sup> (95%CI) | aOR <sup>b</sup> (95%CI) |
|                                                        |              | n (%)       | n (%)     |                  |        |                          |                          | n (%)       | n (%)          |                  |        |                          |                          |
| Complete sample                                        |              | n = 2676    | n = 214   | n = 2890         |        | n = 2583                 | n = 2890                 | n = 2774    | n = 116        | n = 2890         |        | n = 2583                 | n = 2890                 |
|                                                        | Native       | 1341 (94.8) | 74 (5.2)  | 1.00 (reference) |        | 1.00 (reference)         | 1.00 (reference)         | 1377 (97.3) | 38 (2.7)       | 1.00 (reference) |        | 1.00 (reference)         | 1.00 (reference)         |
|                                                        | Full         | 792 (90.6)  | 82 (9.4)  | 1.88 (1.35-2.60) | <0.001 | 1.88 (1.32-2.69)         | 1.82 (1.30-2.54)         | 833 (95.3)  | 41 (4.7)       | 1.78 (1.14-2.80) | <0.001 | 1.91 (1.17-3.13)         | 1.73 (1.09-2.75)         |
|                                                        | Intermediate | 379 (92.0)  | 33 (8.0)  | 1.58 (1.03-2.42) |        | 1.44 (0.89-2.30)         | 1.38 (0.89-2.15)         | 390 (94.7)  | 22 (5.3)       | 2.04 (1.19-3.50) |        | 1.71 (0.93-3.14)         | 1.67 (0.96-2.92)         |
|                                                        | Limited      | 164 (86.8)  | 25 (13.2) | 2.76 (1.71-4.47) |        | 2.43 (1.40-4.20)         | 2.47 (1.49-4.10)         | 174 (92.1)  | 15 (7.9)       | 3.12 (1.68-5.80) |        | 2.14 (1.02-4.49)         | 2.51 (1.31-4.83)         |
| Restricted to natives and recent migrants <sup>c</sup> |              | n = 1835    | n = 144   | n = 1979         |        | n = 1780                 | n = 1979                 | n = 1902    | n = 77         | n = 1979         |        | n = 1780                 | n = 1979                 |
|                                                        | Native       | 1341 (94.8) | 74 (5.2)  | 1.00 (reference) |        | 1.00 (reference)         | 1.00 (reference)         | 1377 (97.3) | 38 (2.7)       | 1.00 (reference) |        | 1.00 (reference)         | 1.00 (reference)         |
|                                                        | Full         | 219 (86.2)  | 35 (13.8) | 2.90 (1.89-4.44) | <0.001 | 2.96 (1.82-4.82)         | 2.83 (1.80-4.45)         | 235 (92.5)  | 19 (7.5)       | 2.93 (1.66-5.17) | <0.001 | 3.57 (1.86-6.86)         | 3.27 (1.79-5.98)         |
|                                                        | Intermediate | 151 (92.1)  | 13 (7.9)  | 1.56 (0.85-2.88) |        | 1.47 (0.76-2.86)         | 1.33 (0.71-2.52)         | 157 (95.7)  | 7 (4.3)        | 1.62 (0.71-3.68) |        | 1.50 (0.60-3.77)         | 1.43 (0.61-3.35)         |
|                                                        | Limited      | 124 (84.9)  | 22 (15.1) | 3.22 (1.93-5.36) |        | 3.28 (1.79-5.99)         | 3.19 (1.82-5.59)         | 133 (91.1)  | 13 (8.8)       | 3.54 (1.84-6.81) |        | 3.18 (1.41-7.18)         | 3.43 (1.65-7.10)         |

OR: crude odds ratios; aOR: adjusted odds ratios. <sup>a</sup> Models adjusted for maternal age, highest educational degree attained, marital status, having an individual health insurance plan, parity, delivery with intervention, and adverse neonatal outcomes, complete-cases analysis. <sup>b</sup> Adjusted models after multiple imputation. <sup>c</sup> Recent migrants are those who have been living in Portugal for  $\leq 5$  years.
